# Supplementary material
Source: publisher site journal article supplement (https://www.dovepress.com/get_supplementary_file.php?f=342759.xlsx)
Supplement: Supplementary file 1 [file get_supplementary_file.php]

## Sheet: Blad1
Patient code	B	C	D	E	F	G	H	I	J	K	L	M	N	O	P	Q	R	S	T	U	V	W	X	Y	Z	AA	AB	AC	AD	AE	AF
L sural latency	3.8	2.6	3.5	2.9		3.45		2.7	2.8											2.8	3	3.6	3.5	3		3.1	3	3.2	3
L sural amplitude	6	12	9	16		15.8		13	13											19	13	6	4	16		28	9	12	15
R sural latency	3.6	2.6	3.4	3	3			2.8	2.7	3.3										2.9	2.9	3.6	3.4	3.7	2.9	2.9	3	3.1	3.2	2.6
R sural amplitude	6	15	13	14	11			12	15	23										17	18	4	5	49	10	23	10	15	13	18
Motor fibular latency (msec)	5.7	3.2	3.4	4.8	4.2	3.7		2.9	3.5	3.9										4	3.5		5.3	3.7	3.95	3.5	3.4	4.9	4.1	3.4
Motor fibular amplitude (µV)	4600	3800	3600	2200	2300	4700		4100	4600	3600										2200	3900		300	4600	1900	3100	3100	2400	2900	3800
Motor fibular conduction velocity (m/s)	43	54	48	45	49	52		49	45	47										46	46		41	49	46	48	45	47	48	49
Side of peroneus testing			R	R	L	L		R	L	L										L	R		R	R	R		R	R	R	L
L Hoffmann reflex latency	35	27.5	30	32.7	30.2	30.6	31.2	30.7	29.4	29.3										29.9	30.9	31.8	36.3	29.4	28.2	30.8	30.6	29.7	NB
R Hoffmann latency	35.7	26.8	30.7	32.5	31	31.15	31.6	30.1	29.6	29.6										29	29.3	33.1	NB	29.6		29.8	29.5	29.4	30.7
Height (m)	180	162	1.68	185	162	1.62	1.74	1.65	1.63	1.66										1.87	1.72	1.68	1.82	1.72	1.67	1.6	1.74	1.7	1.7
L anal reflex latency		48.4	43.8	30.6	43.4	73.2	51.4	63.2	55.4	55.8							102	33.4	65	70	55.6	37.2	65		28.8	33.8	63.8	55.2	35.6
L anal reflex amplitude		2100	1900	2600	2700	400	1900	1500	1200	1800							1400	2200	2300	1500	2000	1400	2100			2200	1400	1500	2700
R anal reflex latency		31	57.8	45.8	62.2	57.6	63.8	82.4	64.8	69.2							73.4	56.4	74.6	82.4	73	39.8	87.2		68.2	54.2	35.4	67.4	58.6
R anal reflex amplitude		2200	1600	950	1000	700	1100	1100	800	1100							2500	2100	1700	1100	1600	900	1700			1000	2600	1100	2200
NEEDLE-EMG
L2 L	0	0	0	0				0	0	0										0	0		0	0	0	0	0	0	0
L2 R	0	0	0	0				0	0	0										1	0	0	0	0	0	0	0	0	0
L3 L	0	0	0	0				0	0	0										0	0	0	0	0	0	0	0	0	0	0
L3 R	0	0	0	0				0	0	0										0	0	0	0	0	0	0	0	0	0	0
L4 L	0	0.5	0	0.5				0	1	0										0	1	0	0	0	0	0	0	1	1	0
L4 R	0	0.5	0	0.5				0	1	0										0	1	0	0.5	0.5	0	1.5	0	0	1	0
L4L5 L	0	1		1				1	1	0											1	0	1	1	0			1		1
L4L5 R	0	0		1				1		0										1	1	1	1	1	0	0		1		2
L5 L	1.5	1	0	0				1	1.5	0.5										0	1.5	0.5	1	1.5	0	2	0	1	1.5	2
L5 R	0	0	0	2				1	0	0.5										2	1.5	0.5	2	2	0	0.5	0	0	0	1
S1 L	0	0	0	0	0		0	1	0	0										0	0.5	0	1	0		0	0	1	1	0
S1 R	0	0	0	0	0		0	0	0	0										0	0.5	0.5	1.5	0	0	0	0	0	0	0
S2 L	2	1	1	0	2	2	1	1	1	2							1		1	1	0	1	1	1		0.5	0	1	2	0.5
S2 R	2.5	1	2	0	1	1	2	1	2	3							2		2	2	0.5	2	1	1		0	1	1	2	0.5
S3S4 L		1.5	1	0	0.5	2.5	1	2	1.5	0.5							3	0	1	0	0.5	0.5	2		0	0.5	2.5	2	0.5	0.5
S3S4 R		0.5	2	1.5	2	1	1	3	2.5	0.5							2	2	2.5	0	1.5	0.5	3		2.5	2.5	0.5	3	2	0.5
Abnormal actvity in the resting muscle
L5	0	0	0	0	0	0	0	0	0	0							NA	NA	0	0	0	0	0	0	NA	0	0	0	0	0
S1	0	0	0	L+R PI 1; PSW 0,5	0	0	0	L+R PI 1	0	0							NA	NA	0	0	0	0	R PI 1; fasc 0,5	0	NA	0	0	0	L PI 1	0
S2 L	FP1,5; PSW 2	PI 1; fasc 1	PI 1; FP 0,5	PI 1; PSW 0,5	fasc 2	PSW 1; fasc 1	PI 1	PI 1	PI 1	PI+; fasc 0,5							fasc 2	NA	0	PSW 1	0	PI 1; PSW 1	FP 1; fasc 1	PSW 1	NA	PI 1	0	PI 1; fasc 0,5	PI 1	0
S2 R	FP 2; PSW 2	PSW 0,5; fasc 1	PI 2; FP 1; PSW-salvo 0,5	fasc 0,5	fasc1	PI 1; fasc 0,5	PI 1: PSW +; fasc 1	PI 1; fasc 1	PI 2	PI 2; fasc 1							fasc 1	NA	0	PSW 2; fasc 1	0	PI 2; PSW 2; FP 1	fasc 1	PI 1; fasc 0,5	NA	0	PI 1; PSW 1; fasc 0,5	PI 1; fasc 1,5	fasc 2	0
S2S3S4																	0	0	0	0	0	0	0	0	0	0	0	0	0	0
Patient code	B	C	D	E	F	G	H	I	J	K	L	M	N	O	P	Q	R	S	T	U	V	W	X	Y	Z	AA	AB	AC	AD	AE
L4 li																					8			10
L4 re																					8
L5 li	10		8					9													8	9
L5 re	8							8													10	8		8				8
S1 li	17		8			10		15	13												11		8		8	8		10	9
S1 re	17		9			11	9	13	12												11		10	9	9	9			10	12
S2 li	34	8			8		17	9	12				9		17		9	15		12			13				13
S2 re				10	9		30	8	13	15	10	10	13				9		8	13			8		12					8
S3 li	12							20	8							17			15	20				35			24			17
S3 re				10	11			10	11	14			8	13	10				9	15				14				12		15	14
S4 li								16																		10
S4 re								13						20											13	14
ESFD
Epidermal small fibers/mm	1.57	5.71	5.24	1.83	5.37	2.49	0.71	4.6	3.35		3.7	3.16	2.72	2.7	1.88	3.25															1.65
Mean for age and sex	8.7	11.2	12.4	9.6	11.2	11.2	11.2	11.2	8.7		8.9	11.2	11.2	12.4	12.4	9.8															11.2
0.05 quantile for sex and age	3.2	5.7	7.1	4.4	5.7	5.7	5.7	5.7	3.2		3.5	5.7	5.7	7.1	7.1	4.3															5.7
Date of birth	1960	1977	1982	1977	1979	1971	1979	1979	1960	1974	1966	1978	1978	1982	1977	1962	1962	1966	1959	1989	1980	1941	1951	1961	1979	1971	1968	1972	1967	1971	1971
Age at the time of EDX	54	39	33	40	41	45	41	37	56	47	54	42	42	38	43	58	58	54	61	31	35	74	64	54	33	44	47	43	49	47	50
Legend	L = left; R = right; MUP = motor unit potential; 0.5 = discrete; 1 = slight; 2 = moderate; 3 = severe
	PI=prolonged insertion activity; PSW=positive sharp waves; NA=not available; fasc=fasciculation potentials; FP=fibrillation potentials
leeftijden ten tijde van EMG en ttv biopsienog kopieren uit de database

## Sheet: EMG results
Patient number	1	2	3	4	5	6	7	8	9	10	11	12	13	14	15	16	17	18	19	20	21	22	23	24
Date of birth	1960	1977	1982	1977	1979	1971	1979	1979	1960	1974	1962	1966	1959	1989	1980	1941	1951	1961	1979	1971	1968	1972	1967	1971
Age at the time of EDX	54	39	33	40	41	45	41	37	56	47	58	54	61	31	35	74	64	54	33	44	47	43	49	47
L sural lat (msec)	3.8	2.6	3.5	2.9		3.45		2.7	2.8					2.8	3	3.6	3.5	3		3.1	3	3.2	3
L sural ampl (µV)	6	12	9	16		15.8		13	13					19	13	6	4	16		28	9	12	15
R sural lat (msec)	3.6	2.6	3.4	3	3			2.8	2.7	3.3				2.9	2.9	3.6	3.4	3.7	2.9	2.9	3	3.1	3.2	2.6
R sural ampl (µV)	6	15	13	14	11			12	15	23				17	18	4	5	49	10	23	10	15	13	18
Motor fibular lat (msec)	5.7	3.2	3.4	4.8	4.2	3.7		2.9	3.5	3.9				4	3.5		5.3	3.7	3.95	3.5	3.4	4.9	4.1	3.4
Motor fibular ampl (µV)	4600	3800	3600	2200	2300	4700		4100	4600	3600				2200	3900		300	4600	1900	3100	3100	2400	2900	3800
Motor fibular cond vel (m/s)	43	54	48	45	49	52		49	45	47				46	46		41	49	46	48	45	47	48	49
Side of peroneus testing			R	R	L	L		R	L	L				L	R		R	R	R		R	R	R	L
L Hoffmann reflex lat (msec)	35	27.5	30	32.7	30.2	30.6	31.2	30.7	29.4	29.3				29.9	30.9	31.8	36.3	29.4	28.2	30.8	30.6	29.7	NB
R Hoffmann reflex lat (msec)	35.7	26.8	30.7	32.5	31	31.15	31.6	30.1	29.6	29.6				29	29.3	33.1	NB	29.6		29.8	29.5	29.4	30.7
Body length (m)	180	162	1.68	185	162	1.62	1.74	1.65	1.63	1.66				1.87	1.72	1.68	1.82	1.72	1.67	1.6	1.74	1.7	1.7
L anal reflex lat (msec)		48.4	43.8	30.6	43.4	73.2	51.4	63.2	55.4	55.8	102	33.4	65	70	55.6	37.2	65		28.8	33.8	63.8	55.2	35.6
L anal reflex ampl (µV)		2100	1900	2600	2700	400	1900	1500	1200	1800	1400	2200	2300	1500	2000	1400	2100			2200	1400	1500	2700
R anal reflex lat (msec)		31	57.8	45.8	62.2	57.6	63.8	82.4	64.8	69.2	73.4	56.4	74.6	82.4	73	39.8	87.2		68.2	54.2	35.4	67.4	58.6
R anal reflex ampl (µV)		2200	1600	950	1000	700	1100	1100	800	1100	2500	2100	1700	1100	1600	900	1700			1000	2600	1100	2200
NEEDLE-EMG Severity scores: 0 = normal ; 0.5 = discrete (<50% PP MUPs) 1 = slight (≥50% PP MUPs); 2 = moderate (≥75% PP MUPs); 3 = severe (≥90% PP MUPs)
L2 L	0	0	0	0				0	0	0				0	0		0	0	0	0	0	0	0
L2 R	0	0	0	0				0	0	0				1	0	0	0	0	0	0	0	0	0
L3 L	0	0	0	0				0	0	0				0	0	0	0	0	0	0	0	0	0	0
L3 R	0	0	0	0				0	0	0				0	0	0	0	0	0	0	0	0	0	0
L4 L	0	0.5	0	0.5				0	1	0				0	1	0	0	0	0	0	0	1	1	0
L4 R	0	0.5	0	0.5				0	1	0				0	1	0	0.5	0.5	0	1.5	0	0	1	0
L4L5 L	0	1		1				1	1	0					1	0	1	1	0			1		1
L4L5 R	0	0		1				1		0				1	1	1	1	1	0	0		1		2
L5 L	1.5	1	0	0				1	1.5	0.5				0	1.5	0.5	1	1.5	0	2	0	1	1.5	2
L5 R	0	0	0	2				1	0	0.5				2	1.5	0.5	2	2	0	0.5	0	0	0	1
S1 L	0	0	0	0	0		0	1	0	0				0	0.5	0	1	0		0	0	1	1	0
S1 R	0	0	0	0	0		0	0	0	0				0	0.5	0.5	1.5	0	0	0	0	0	0	0
S2 L	2	1	1	0	2	2	1	1	1	2	1		1	1	0	1	1	1		0.5	0	1	2	0.5
S2 R	2.5	1	2	0	1	1	2	1	2	3	2		2	2	0.5	2	1	1		0	1	1	2	0.5
S3S4 L		1.5	1	0	0.5	2.5	1	2	1.5	0.5	3	0	1	0	0.5	0.5	2		0	0.5	2.5	2	0.5	0.5
S3S4 R		0.5	2	1.5	2	1	1	3	2.5	0.5	2	2	2.5	0	1.5	0.5	3		2.5	2.5	0.5	3	2	0.5
Abnormal actvity in the resting muscle: (0.5 = discrete; 1 = slight; 2 = moderate; 3 = severe)
L5	0	0	0	0	0	0	0	0	0	0			0	0	0	0	0	0		0	0	0	0	0
S1	0	0	0	L+R PI 1; PSW 0,5	0	0	0	L+R PI 1	0	0			0	0	0	0	R PI 1; Fasc 0,5	0		0	0	0	L PI 1	0
S2 L	FP1,5; PSW 2	PI 1; Fasc 1	PI 1; FP 0,5	PI 1; PSW 0,5	Fasc 2	PSW 1; Fasc 1	PI 1	PI 1	PI 1	PI+; Fasc 0,5	Fasc 2		0	PSW 1	0	PI 1; PSW 1	FP 1; Fasc 1	PSW 1		PI 1	0	PI 1; Fasc 0,5	PI 1	0
S2 R	FP 2; PSW 2	PSW 0,5; Fasc 1	PI 2; FP 1; PSW-salvo 0,5	Fasc 0,5	Fasc1	PI 1; Fasc 0,5	PI 1: PSW +; Fasc 1	PI 1; Fasc 1	PI 2	PI 2; Fasc 1	Fasc 1		0	PSW 2; Fasc 1	0	PI 2; PSW 2; FP 1	Fasc 1	PI 1; Fasc 0,5		0	PI 1; PSW 1; Fasc 0,5	PI 1; Fasc 1,5	Fasc 2	0
S2S3S4											0	0	0	0	0	0	0	0	0	0	0	0	0	0
Nerve roots Size of Tarlov cysts (mm)
L4 li															8			10
L4 re															8
L5 li	10		8					9							8	9
L5 re	8							8							10	8		8				8
S1 li	17		8			10		15	13						11		8		8	8		10	9
S1 re	17		9			11	9	13	12						11		10	9	9	9			10	12
S2 li	34	8			8		17	9	12		9	15		12			13				13
S2 re				10	9		30	8	13	15	9		8	13			8		12					8
S3 li	12							20	8				15	20				35			24			17
S3 re				10	11			10	11	14			9	15				14				12		15
S4 li								16												10
S4 re								13											13	14
Symptoms
Side of the pain	L	L+R	L+R	R	L+R	L	L+R	L+R	L+R	L+R	L	L+R	L+R	L+R	R	L5li	L+R	L	R	L	L	L+R	L+R	L+R
Mild fecal incontinence	0	0	0	0	x	x	x	x	0	0	x	x	0	x	x	x		x	0	x	x	x	0	0
Severe fecal incontinence	0	0	0	0	0	0	0	0	0	0	x	0	0	0	x	0	0	x	0	0	0	0	0	0
Legend	lat = latency, ampl = amplitude; L = left; R = right; MUPs = motor unit potentials;
	PP = polyphasic; PI=prolonged insertion activity; PSW=positive sharp waves; Fasc=fasciculation potentials; FP=fibrillation potentials
